# Supplementary figures and images for: Substance Abuse in Emerging Adults: The Role of Neuromelanin and Ventral Striatal Response to Social and Monetary Rewards
Source: MDPI journal article supplement (doi:10.3390/brainsci12030352), 2022-03-04

Supplementary Materials:

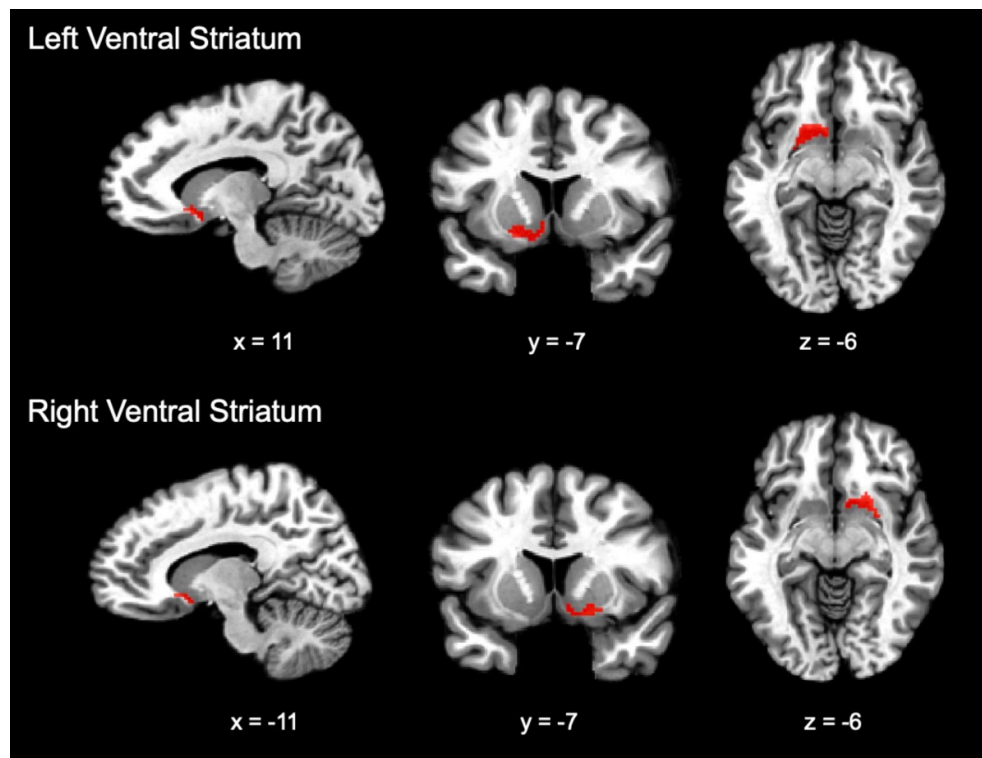

**Figure S1:** Anatomical masks of left and right ventral striatum.

Supplement: s1 [file s1]
